# Supplementary material
Source: publisher figshare collection journal article supplement (https://frontiersin.figshare.com/ndownloader/files/25559132)

# checkCIF/PLATON report

You have not supplied any structure factors. As a result the full set of tests cannot be run.

THIS REPORT IS FOR GUIDANCE ONLY. IF USED AS PART OF A REVIEW PROCEDURE FOR PUBLICATION, IT SHOULD NOT REPLACE THE EXPERTISE OF AN EXPERIENCED CRYSTALLOGRAPHIC REFEREE.

No syntax errors found.      CIF dictionary      Interpreting this report

## Datablock: compound\_dimer\_Dy

---

Bond precision:    N- C = 0.0261 A                      Wavelength=0.71073

Cell:                a=14.0216(3)                b=14.4472(2)                c=23.5468(4)  
                      alpha=106.148(1)        beta=94.726(1)        gamma=110.584(2)  
Temperature:        296 K

|                | Calculated                                                       | Reported    |
|----------------|------------------------------------------------------------------|-------------|
| Volume         | 4202.26(15)                                                      | 4202.26(14) |
| Space group    | P -1                                                             | P -1        |
| Hall group     | -P 1                                                             | -P 1        |
| Moiety formula | Dy2 O128 Te2 W34, 8(C2 N), ?<br>5(O) [+ solvent]                 |             |
| Sum formula    | C16 Dy2 N8 O133 Te2 W34 [+ C32 H192 Dy2 N16 O151 Te2<br>solvent] | W34         |
| Mr             | 9263.00                                                          | 10048.64    |
| Dx, g cm-3     | 3.660                                                            | 3.970       |
| Z              | 1                                                                | 1           |
| Mu (mm-1)      | 24.467                                                           | 24.467      |
| F000           | 3968.0                                                           | 3968.0      |
| F000'          | 3945.09                                                          |             |
| h,k,lmax       | 20,21,34                                                         | 20,20,34    |
| Nref           | 28238                                                            | 24685       |
| Tmin,Tmax      | 0.004,0.087                                                      | 0.004,0.087 |
| Tmin'          | 0.000                                                            |             |

Correction method= # Reported T Limits: Tmin=0.004 Tmax=0.087  
AbsCorr = MULTI-SCAN

Data completeness= 0.874                      Theta(max)= 31.604

R(reflections)= 0.0477( 18635)                wR2(reflections)= 0.1222( 24685)

S = 1.066                                      Npar= 883

---

The following ALERTS were generated. Each ALERT has the format

**test-name\_ALERT\_alert-type\_alert-level.**

Click on the hyperlinks for more details of the test.

---

[IMAGE] **Alert level B**

|                   |                                                 |           |
|-------------------|-------------------------------------------------|-----------|
| PLAT097_ALERT_2_B | Large Reported Max. (Positive) Residual Density | 7.57 eA-3 |
| PLAT306_ALERT_2_B | Isolated Oxygen Atom (H-atoms Missing ?) .....  | 065 Check |
| PLAT306_ALERT_2_B | Isolated Oxygen Atom (H-atoms Missing ?) .....  | 066 Check |

---

[IMAGE] **Alert level C**

DIFMX02\_ALERT\_1\_C The maximum difference density is > 0.1\*ZMAX\*0.75  
The relevant atom site should be identified.

|                   |                                                  |             |
|-------------------|--------------------------------------------------|-------------|
| PLAT094_ALERT_2_C | Ratio of Maximum / Minimum Residual Density .... | 2.68 Report |
| PLAT220_ALERT_2_C | NonSolvent Resd 1 O Ueq(max)/Ueq(min) Range      | 3.3 Ratio   |
| PLAT244_ALERT_4_C | Low 'Solvent' Ueq as Compared to Neighbors of    | N1 Check    |
| PLAT244_ALERT_4_C | Low 'Solvent' Ueq as Compared to Neighbors of    | N2 Check    |
| PLAT244_ALERT_4_C | Low 'Solvent' Ueq as Compared to Neighbors of    | N3 Check    |

---

[IMAGE] **Alert level G**

FORMU01\_ALERT\_2\_G There is a discrepancy between the atom counts in the  
\_chemical\_formula\_sum and the formula from the \_atom\_site\* data.  
Atom count from \_chemical\_formula\_sum: C32 H192 Dy2 N16 O151 Te2 W34  
Atom count from the \_atom\_site data: C16 Dy2 N8 O133 Te2 W34

CELLZ01\_ALERT\_1\_G Difference between formula and atom\_site contents detected.  
CELLZ01\_ALERT\_1\_G ALERT: Large difference may be due to a  
symmetry error - see SYMMG tests  
From the CIF: \_cell\_formula\_units\_Z 1  
From the CIF: \_chemical\_formula\_sum C32 H192 Dy2 N16 O151 Te2 W34  
TEST: Compare cell contents of formula and atom\_site data

| atom | Z*formula | cif sites | diff   |
|------|-----------|-----------|--------|
| C    | 32.00     | 16.00     | 16.00  |
| H    | 192.00    | 0.00      | 192.00 |
| Dy   | 2.00      | 2.00      | 0.00   |
| N    | 16.00     | 8.00      | 8.00   |
| O    | 151.00    | 133.00    | 18.00  |
| Te   | 2.00      | 2.00      | 0.00   |
| W    | 34.00     | 34.00     | 0.00   |

|                   |                                                  |              |
|-------------------|--------------------------------------------------|--------------|
| PLAT003_ALERT_2_G | Number of Uiso or Uij Restrained non-H Atoms ... | 2 Report     |
| PLAT012_ALERT_1_G | N.O.K. _shelx_res_checksum Found in CIF .....    | Please Check |
| PLAT040_ALERT_1_G | No H-atoms in this Carbon Containing Compound .. | Please Check |
| PLAT041_ALERT_1_G | Calc. and Reported SumFormula Strings Differ     | Please Check |
| PLAT066_ALERT_1_G | Predicted and Reported Tmin&Tmax Range Identical | ? Check      |
| PLAT083_ALERT_2_G | SHELXL Second Parameter in WGHT Unusually Large  | 23.78 Why ?  |
| PLAT186_ALERT_4_G | The CIF-Embedded .res File Contains ISOR Records | 3 Report     |
| PLAT300_ALERT_4_G | Atom Site Occupancy of O67 Constrained at        | 0.5 Check    |
| PLAT302_ALERT_4_G | Anion/Solvent/Minor-Residue Disorder (Resd 8 )   | 100% Note    |
| PLAT304_ALERT_4_G | Non-Integer Number of Atoms in ..... (Resd 8 )   | 0.50 Check   |
| PLAT311_ALERT_2_G | Isolated Disordered Oxygen Atom (No H's ?) ..... | 067 Check    |
| PLAT606_ALERT_4_G | Solvent Accessible VOID(S) in Structure .....    | ! Info       |
| PLAT794_ALERT_5_G | Tentative Bond Valency for W1 (VI) .             | 6.26 Info    |
| PLAT794_ALERT_5_G | Tentative Bond Valency for W2 (VI) .             | 6.16 Info    |
| PLAT794_ALERT_5_G | Tentative Bond Valency for W3 (VI) .             | 6.11 Info    |
| PLAT794_ALERT_5_G | Tentative Bond Valency for W4 (VI) .             | 6.10 Info    |
| PLAT794_ALERT_5_G | Tentative Bond Valency for W5 (VI) .             | 6.25 Info    |
| PLAT794_ALERT_5_G | Tentative Bond Valency for W6 (VI) .             | 6.16 Info    |
| PLAT794_ALERT_5_G | Tentative Bond Valency for W7 (VI) .             | 6.18 Info    |
| PLAT794_ALERT_5_G | Tentative Bond Valency for W8 (VI) .             | 6.07 Info    |
| PLAT794_ALERT_5_G | Tentative Bond Valency for W9 (VI) .             | 6.26 Info    |

|                   |                                                  |       |   |      |      |
|-------------------|--------------------------------------------------|-------|---|------|------|
| PLAT794_ALERT_5_G | Tentative Bond Valency for W10                   | (VI)  | . | 6.19 | Info |
| PLAT794_ALERT_5_G | Tentative Bond Valency for W11                   | (VI)  | . | 6.08 | Info |
| PLAT794_ALERT_5_G | Tentative Bond Valency for W12                   | (VI)  | . | 6.15 | Info |
| PLAT794_ALERT_5_G | Tentative Bond Valency for W13                   | (VI)  | . | 6.20 | Info |
| PLAT794_ALERT_5_G | Tentative Bond Valency for W14                   | (VI)  | . | 6.18 | Info |
| PLAT794_ALERT_5_G | Tentative Bond Valency for W15                   | (VI)  | . | 6.21 | Info |
| PLAT794_ALERT_5_G | Tentative Bond Valency for W16                   | (VI)  | . | 6.17 | Info |
| PLAT794_ALERT_5_G | Tentative Bond Valency for W17                   | (VI)  | . | 6.07 | Info |
| PLAT794_ALERT_5_G | Tentative Bond Valency for Dyl                   | (III) | . | 3.05 | Info |
| PLAT794_ALERT_5_G | Tentative Bond Valency for Tel                   | (VI)  | . | 5.37 | Info |
| PLAT860_ALERT_3_G | Number of Least-Squares Restraints .....         |       |   | 12   | Note |
| PLAT868_ALERT_4_G | ALERTS Due to the Use of _smtbx_masks Suppressed |       |   | !    | Info |
| PLAT933_ALERT_2_G | Number of OMIT Records in Embedded .res File ... |       |   | 1    | Note |
| PLAT941_ALERT_3_G | Average HKL Measurement Multiplicity .....       |       |   | 2.2  | Low  |

---

0 **ALERT level A** = Most likely a serious problem - resolve or explain  
 3 **ALERT level B** = A potentially serious problem, consider carefully  
 6 **ALERT level C** = Check. Ensure it is not caused by an omission or oversight  
 38 **ALERT level G** = General information/check it is not something unexpected

7 ALERT type 1 CIF construction/syntax error, inconsistent or missing data  
 10 ALERT type 2 Indicator that the structure model may be wrong or deficient  
 2 ALERT type 3 Indicator that the structure quality may be low  
 9 ALERT type 4 Improvement, methodology, query or suggestion  
 19 ALERT type 5 Informative message, check

---

## Datablock: compound\_dimer\_Ho

---

Bond precision: N- C = 0.0250 A

Wavelength=0.71073

Cell: a=14.0253(3) b=14.4358(3) c=23.5321(4)  
 alpha=106.1507(18) beta=94.6938(17) gamma=110.605(2)  
 Temperature: 296 K

|                | Calculated                                                          | Reported    |
|----------------|---------------------------------------------------------------------|-------------|
| Volume         | 4197.21(17)                                                         | 4197.21(17) |
| Space group    | P -1                                                                | P -1        |
| Hall group     | -P 1                                                                | -P 1        |
| Moiety formula | Ho2 O128 Te2 W34, 6(C2 N),<br>2(C2 N0.50), 4.5(O) [+<br>solvent]    | ?           |
| Sum formula    | C16 Ho2 N7 O132.50 Te2 W34 C30 H187 Ho2 N15 O152 Te2<br>[+ solvent] | W34         |
| Mr             | 9245.85                                                             | 10026.44    |
| Dx,g cm-3      | 3.658                                                               | 3.966       |
| Z              | 1                                                                   | 1           |
| Mu (mm-1)      | 24.548                                                              | 24.548      |
| F000           | 3959.0                                                              | 3959.0      |
| F000'          | 3936.07                                                             |             |
| h,k,lmax       | 20,21,34                                                            | 20,20,34    |
| Nref           | 28150                                                               | 24778       |
| Tmin,Tmax      | 0.004,0.086                                                         | 0.004,0.086 |
| Tmin'          | 0.000                                                               |             |

Correction method= # Reported T Limits: Tmin=0.004 Tmax=0.086  
AbsCorr = MULTI-SCAN

Data completeness= 0.880                      Theta(max)= 31.585

R(reflections)= 0.0494( 17357)              wR2(reflections)= 0.1106( 24778)

S = 1.053                                      Npar= 883

---

The following ALERTS were generated. Each ALERT has the format

**test-name\_ALERT\_alert-type\_alert-level.**

Click on the hyperlinks for more details of the test.

---

[IMAGE] **Alert level B**

PLAT306\_ALERT\_2\_B Isolated Oxygen Atom (H-atoms Missing ?) ..... 065 Check

---

[IMAGE] **Alert level C**

PLAT094\_ALERT\_2\_C Ratio of Maximum / Minimum Residual Density .... 2.57 Report  
 PLAT213\_ALERT\_2\_C Atom O55                      has ADP max/min Ratio ..... 3.3 oblate  
 PLAT220\_ALERT\_2\_C NonSolvent    Resd 1    O    Ueq(max)/Ueq(min) Range    3.1 Ratio  
 PLAT244\_ALERT\_4\_C Low           'Solvent' Ueq as Compared to Neighbors of    N3 Check

---

[IMAGE] **Alert level G**

FORMU01\_ALERT\_2\_G There is a discrepancy between the atom counts in the  
     \_chemical\_formula\_sum and the formula from the \_atom\_site\* data.  
     Atom count from \_chemical\_formula\_sum: C30 H187 Ho2 N15 O152 Te2 W34  
     Atom count from the \_atom\_site data:    C16 Ho2 N7 O132.5 Te2 W34  
 CELLZ01\_ALERT\_1\_G Difference between formula and atom\_site contents detected.  
 CELLZ01\_ALERT\_1\_G ALERT: Large difference may be due to a  
     symmetry error - see SYMMG tests

From the CIF: \_cell\_formula\_units\_Z 1  
 From the CIF: \_chemical\_formula\_sum C30 H187 Ho2 N15 O152 Te2 W34  
 TEST: Compare cell contents of formula and atom\_site data

| atom              | Z*formula                                        | cif sites | diff   |              |
|-------------------|--------------------------------------------------|-----------|--------|--------------|
| C                 | 30.00                                            | 16.00     | 14.00  |              |
| H                 | 187.00                                           | 0.00      | 187.00 |              |
| Ho                | 2.00                                             | 2.00      | 0.00   |              |
| N                 | 15.00                                            | 7.00      | 8.00   |              |
| O                 | 152.00                                           | 132.50    | 19.50  |              |
| Te                | 2.00                                             | 2.00      | 0.00   |              |
| W                 | 34.00                                            | 34.00     | 0.00   |              |
| PLAT003_ALERT_2_G | Number of Uiso or Uij Restrained non-H Atoms ... |           | 19     | Report       |
| PLAT012_ALERT_1_G | N.O.K. _shelx_res_checksum Found in CIF .....    |           |        | Please Check |
| PLAT040_ALERT_1_G | No H-atoms in this Carbon Containing Compound .. |           |        | Please Check |
| PLAT041_ALERT_1_G | Calc. and Reported SumFormula Strings Differ     |           |        | Please Check |
| PLAT066_ALERT_1_G | Predicted and Reported Tmin&Tmax Range Identical |           |        | ? Check      |
| PLAT083_ALERT_2_G | SHELXL Second Parameter in WGHT Unusually Large  |           | 22.26  | Why ?        |
| PLAT178_ALERT_4_G | The CIF-Embedded .res File Contains SIMU Records |           | 1      | Report       |
| PLAT186_ALERT_4_G | The CIF-Embedded .res File Contains ISOR Records |           | 4      | Report       |
| PLAT300_ALERT_4_G | Atom Site Occupancy of N4 Constrained at         |           | 0.5    | Check        |
| PLAT300_ALERT_4_G | Atom Site Occupancy of O66 Constrained at        |           | 0.75   | Check        |
| PLAT300_ALERT_4_G | Atom Site Occupancy of O67 Constrained at        |           | 0.5    | Check        |
| PLAT302_ALERT_4_G | Anion/Solvent/Minor-Residue Disorder (Resd 5 )   |           | 20%    | Note         |
| PLAT302_ALERT_4_G | Anion/Solvent/Minor-Residue Disorder (Resd 7 )   |           | 100%   | Note         |
| PLAT302_ALERT_4_G | Anion/Solvent/Minor-Residue Disorder (Resd 8 )   |           | 100%   | Note         |
| PLAT304_ALERT_4_G | Non-Integer Number of Atoms in ..... (Resd 5 )   |           | 2.50   | Check        |
| PLAT304_ALERT_4_G | Non-Integer Number of Atoms in ..... (Resd 7 )   |           | 0.75   | Check        |
| PLAT304_ALERT_4_G | Non-Integer Number of Atoms in ..... (Resd 8 )   |           | 0.50   | Check        |
| PLAT311_ALERT_2_G | Isolated Disordered Oxygen Atom (No H's ?) ..... |           | 066    | Check        |
| PLAT311_ALERT_2_G | Isolated Disordered Oxygen Atom (No H's ?) ..... |           | 067    | Check        |
| PLAT606_ALERT_4_G | Solvent Accessible VOID(S) in Structure .....    |           | !      | Info         |
| PLAT720_ALERT_4_G | Number of Unusual/Non-Standard Labels .....      |           | 1      | Note         |
| PLAT790_ALERT_4_G | Centre of Gravity not Within Unit Cell: Resd. #  |           | 3      | Note         |
| C2 N              |                                                  |           |        |              |
| PLAT794_ALERT_5_G | Tentative Bond Valency for W1 (VI) .             |           | 6.14   | Info         |
| PLAT794_ALERT_5_G | Tentative Bond Valency for W2 (VI) .             |           | 6.17   | Info         |
| PLAT794_ALERT_5_G | Tentative Bond Valency for W3 (VI) .             |           | 6.24   | Info         |
| PLAT794_ALERT_5_G | Tentative Bond Valency for W4 (VI) .             |           | 6.17   | Info         |
| PLAT794_ALERT_5_G | Tentative Bond Valency for W5 (VI) .             |           | 6.11   | Info         |
| PLAT794_ALERT_5_G | Tentative Bond Valency for W6 (VI) .             |           | 6.09   | Info         |
| PLAT794_ALERT_5_G | Tentative Bond Valency for W7 (VI) .             |           | 6.23   | Info         |
| PLAT794_ALERT_5_G | Tentative Bond Valency for W8 (VI) .             |           | 6.08   | Info         |
| PLAT794_ALERT_5_G | Tentative Bond Valency for W9 (VI) .             |           | 6.12   | Info         |
| PLAT794_ALERT_5_G | Tentative Bond Valency for W10 (VI) .            |           | 6.13   | Info         |
| PLAT794_ALERT_5_G | Tentative Bond Valency for W11 (VI) .            |           | 6.15   | Info         |
| PLAT794_ALERT_5_G | Tentative Bond Valency for W12 (VI) .            |           | 6.28   | Info         |
| PLAT794_ALERT_5_G | Tentative Bond Valency for W13 (VI) .            |           | 6.14   | Info         |
| PLAT794_ALERT_5_G | Tentative Bond Valency for W14 (VI) .            |           | 6.17   | Info         |
| PLAT794_ALERT_5_G | Tentative Bond Valency for W15 (VI) .            |           | 6.21   | Info         |
| PLAT794_ALERT_5_G | Tentative Bond Valency for W16 (VI) .            |           | 6.12   | Info         |
| PLAT794_ALERT_5_G | Tentative Bond Valency for W17 (VI) .            |           | 6.28   | Info         |
| PLAT794_ALERT_5_G | Tentative Bond Valency for Ho1 (III) .           |           | 3.33   | Info         |
| PLAT794_ALERT_5_G | Tentative Bond Valency for Te1 (VI) .            |           | 5.45   | Info         |
| PLAT860_ALERT_3_G | Number of Least-Squares Restraints .....         |           | 102    | Note         |
| PLAT868_ALERT_4_G | ALERTS Due to the Use of _smtbx_masks Suppressed |           | !      | Info         |
| PLAT933_ALERT_2_G | Number of OMIT Records in Embedded .res File ... |           | 4      | Note         |
| PLAT941_ALERT_3_G | Average HKL Measurement Multiplicity .....       |           | 2.3    | Low          |

---

0 **ALERT level A** = Most likely a serious problem - resolve or explain  
 1 **ALERT level B** = A potentially serious problem, consider carefully

4 **ALERT level C** = Check. Ensure it is not caused by an omission or oversight  
48 **ALERT level G** = General information/check it is not something unexpected

6 ALERT type 1 CIF construction/syntax error, inconsistent or missing data  
10 ALERT type 2 Indicator that the structure model may be wrong or deficient  
2 ALERT type 3 Indicator that the structure quality may be low  
16 ALERT type 4 Improvement, methodology, query or suggestion  
19 ALERT type 5 Informative message, check

---

## Datablock: compound\_dimer\_Er

---

Bond precision: N- C = 0.0275 A Wavelength=0.71073

Cell: a=14.0161(3) b=14.4504(2) c=23.5104(3)  
alpha=106.196(1) beta=94.686(1) gamma=110.566(2)  
Temperature: 296 K

|                        | Calculated                                                                                                                                                                                                       | Reported        |
|------------------------|------------------------------------------------------------------------------------------------------------------------------------------------------------------------------------------------------------------|-----------------|
| Volume                 | 4194.99(14)                                                                                                                                                                                                      | 4194.98(13)     |
| Space group            | P -1                                                                                                                                                                                                             | P -1            |
| Hall group             | -P 1                                                                                                                                                                                                             | -P 1            |
| Moiety formula         | Er <sub>2</sub> O <sub>12</sub> Te <sub>2</sub> W <sub>34</sub> , 8(C <sub>2</sub> N), ?<br>4(O) [+ solvent]                                                                                                     |                 |
| Sum formula            | C <sub>16</sub> Er <sub>2</sub> N <sub>8</sub> O <sub>132</sub> Te <sub>2</sub> W <sub>34</sub> [+ C <sub>30</sub> H <sub>189</sub> Er <sub>2</sub> N <sub>15</sub> O <sub>153</sub> Te <sub>2</sub><br>solvent] | W <sub>34</sub> |
| Mr                     | 9256.52                                                                                                                                                                                                          | 10049.11        |
| Dx, g cm <sup>-3</sup> | 3.664                                                                                                                                                                                                            | 3.978           |
| Z                      | 1                                                                                                                                                                                                                | 1               |
| Mu (mm <sup>-1</sup> ) | 24.619                                                                                                                                                                                                           | 24.619          |
| F <sub>000</sub>       | 3964.0                                                                                                                                                                                                           | 3964.0          |
| F <sub>000</sub> '     | 3941.01                                                                                                                                                                                                          |                 |
| h,k,lmax               | 20,21,34                                                                                                                                                                                                         | 20,20,33        |
| Nref                   | 27769                                                                                                                                                                                                            | 24370           |
| Tmin,Tmax              | 0.004,0.085                                                                                                                                                                                                      | 0.004,0.085     |
| Tmin'                  | 0.000                                                                                                                                                                                                            |                 |

Correction method= # Reported T Limits: Tmin=0.004 Tmax=0.085  
AbsCorr = MULTI-SCAN

Data completeness= 0.878 Theta(max)= 31.428

R(reflections)= 0.0503( 19388) wR2(reflections)= 0.1374( 24370)

S = 1.064 Npar= 874

---

The following ALERTS were generated. Each ALERT has the format

**test-name\_ALERT\_alert-type\_alert-level.**

Click on the hyperlinks for more details of the test.

---

[IMAGE] **Alert level B**

|                   |                                          |       |     |       |
|-------------------|------------------------------------------|-------|-----|-------|
| PLAT306_ALERT_2_B | Isolated Oxygen Atom (H-atoms Missing ?) | ..... | 065 | Check |
| PLAT306_ALERT_2_B | Isolated Oxygen Atom (H-atoms Missing ?) | ..... | 066 | Check |

---

[IMAGE] **Alert level C**

|                   |            |           |                                 |     |       |
|-------------------|------------|-----------|---------------------------------|-----|-------|
| PLAT220_ALERT_2_C | NonSolvent | Resd 1 O  | Ueq(max)/Ueq(min) Range         | 3.1 | Ratio |
| PLAT244_ALERT_4_C | Low        | 'Solvent' | Ueq as Compared to Neighbors of | N1  | Check |
| PLAT244_ALERT_4_C | Low        | 'Solvent' | Ueq as Compared to Neighbors of | N3  | Check |

---

[IMAGE] **Alert level G**

FORMU01\_ALERT\_2\_G There is a discrepancy between the atom counts in the  
 \_chemical\_formula\_sum and the formula from the \_atom\_site\* data.  
 Atom count from \_chemical\_formula\_sum: C30 H189 Er2 N15 O153 Te2 W34  
 Atom count from the \_atom\_site data: C16 Er2 N8 O132 Te2 W34

CELLZ01\_ALERT\_1\_G Difference between formula and atom\_site contents detected.

CELLZ01\_ALERT\_1\_G ALERT: Large difference may be due to a  
 symmetry error - see SYMMG tests

From the CIF: \_cell\_formula\_units\_Z 1

From the CIF: \_chemical\_formula\_sum C30 H189 Er2 N15 O153 Te2 W34

TEST: Compare cell contents of formula and atom\_site data

| atom | Z*formula | cif sites | diff   |
|------|-----------|-----------|--------|
| C    | 30.00     | 16.00     | 14.00  |
| H    | 189.00    | 0.00      | 189.00 |
| Er   | 2.00      | 2.00      | 0.00   |
| N    | 15.00     | 8.00      | 7.00   |
| O    | 153.00    | 132.00    | 21.00  |
| Te   | 2.00      | 2.00      | 0.00   |
| W    | 34.00     | 34.00     | 0.00   |

|                   |                                                  |       |              |
|-------------------|--------------------------------------------------|-------|--------------|
| PLAT003_ALERT_2_G | Number of Uiso or Uij Restrained non-H Atoms ... | 11    | Report       |
| PLAT012_ALERT_1_G | N.O.K. _shelx_res_checksum Found in CIF .....    |       | Please Check |
| PLAT040_ALERT_1_G | No H-atoms in this Carbon Containing Compound .. |       | Please Check |
| PLAT041_ALERT_1_G | Calc. and Reported SumFormula Strings Differ     |       | Please Check |
| PLAT066_ALERT_1_G | Predicted and Reported Tmin&Tmax Range Identical | ?     | Check        |
| PLAT083_ALERT_2_G | SHELXL Second Parameter in WGHT Unusually Large  | 55.28 | Why ?        |
| PLAT186_ALERT_4_G | The CIF-Embedded .res File Contains ISOR Records | 6     | Report       |
| PLAT606_ALERT_4_G | Solvent Accessible VOID(S) in Structure .....    | !     | Info         |
| PLAT794_ALERT_5_G | Tentative Bond Valency for W1 (VI)               | 6.07  | Info         |
| PLAT794_ALERT_5_G | Tentative Bond Valency for W2 (VI)               | 6.18  | Info         |
| PLAT794_ALERT_5_G | Tentative Bond Valency for W3 (VI)               | 6.26  | Info         |
| PLAT794_ALERT_5_G | Tentative Bond Valency for W4 (VI)               | 6.16  | Info         |
| PLAT794_ALERT_5_G | Tentative Bond Valency for W5 (VI)               | 6.17  | Info         |
| PLAT794_ALERT_5_G | Tentative Bond Valency for W6 (VI)               | 6.21  | Info         |
| PLAT794_ALERT_5_G | Tentative Bond Valency for W7 (VI)               | 6.07  | Info         |
| PLAT794_ALERT_5_G | Tentative Bond Valency for W8 (VI)               | 6.25  | Info         |
| PLAT794_ALERT_5_G | Tentative Bond Valency for W9 (VI)               | 6.22  | Info         |
| PLAT794_ALERT_5_G | Tentative Bond Valency for W10 (VI)              | 6.17  | Info         |
| PLAT794_ALERT_5_G | Tentative Bond Valency for W11 (VI)              | 6.18  | Info         |
| PLAT794_ALERT_5_G | Tentative Bond Valency for W12 (VI)              | 6.21  | Info         |
| PLAT794_ALERT_5_G | Tentative Bond Valency for W13 (VI)              | 6.35  | Info         |
| PLAT794_ALERT_5_G | Tentative Bond Valency for W14 (VI)              | 6.07  | Info         |
| PLAT794_ALERT_5_G | Tentative Bond Valency for W15 (VI)              | 6.07  | Info         |
| PLAT794_ALERT_5_G | Tentative Bond Valency for W16 (VI)              | 6.01  | Info         |
| PLAT794_ALERT_5_G | Tentative Bond Valency for W17 (VI)              | 6.13  | Info         |
| PLAT794_ALERT_5_G | Tentative Bond Valency for Er1 (III)             | 3.13  | Info         |

|                                                                |            |      |      |
|----------------------------------------------------------------|------------|------|------|
| PLAT794_ALERT_5_G Tentative Bond Valency for Te1               | (VI)       | 5.48 | Info |
| PLAT860_ALERT_3_G Number of Least-Squares Restraints           | .....      | 66   | Note |
| PLAT868_ALERT_4_G ALERTS Due to the Use of _smtbx_masks        | Suppressed | !    | Info |
| PLAT933_ALERT_2_G Number of OMIT Records in Embedded .res File | ...        | 4    | Note |
| PLAT941_ALERT_3_G Average HKL Measurement Multiplicity         | .....      | 2.1  | Low  |

---

0 **ALERT level A** = Most likely a serious problem - resolve or explain  
 2 **ALERT level B** = A potentially serious problem, consider carefully  
 3 **ALERT level C** = Check. Ensure it is not caused by an omission or oversight  
 34 **ALERT level G** = General information/check it is not something unexpected

6 ALERT type 1 CIF construction/syntax error, inconsistent or missing data  
 7 ALERT type 2 Indicator that the structure model may be wrong or deficient  
 2 ALERT type 3 Indicator that the structure quality may be low  
 5 ALERT type 4 Improvement, methodology, query or suggestion  
 19 ALERT type 5 Informative message, check

---

## Datablock: compound\_dimer\_Tm

---

Bond precision: N- C = 0.0337 A Wavelength=0.71073

Cell: a=14.1499(5) b=14.5884(5) c=23.7181(7)  
 alpha=106.195(3) beta=94.601(3) gamma=110.596(3)  
 Temperature: 296 K

|                | Calculated                                                       | Reported    |
|----------------|------------------------------------------------------------------|-------------|
| Volume         | 4313.7(3)                                                        | 4313.7(3)   |
| Space group    | P -1                                                             | P -1        |
| Hall group     | -P 1                                                             | -P 1        |
| Moiety formula | O128 Te2 Tm2 W34, 8(C2 N)<br>[+ solvent]                         | ?           |
| Sum formula    | C16 N8 O128 Te2 Tm2 W34 [+ C30 H195 N15 O156 Te2 Tm2<br>solvent] | W34         |
| Mr             | 9195.86                                                          | 10106.50    |
| Dx,g cm-3      | 3.540                                                            | 3.890       |
| Z              | 1                                                                | 1           |
| Mu (mm-1)      | 23.994                                                           | 23.994      |
| F000           | 3934.0                                                           | 3934.0      |
| F000'          | 3910.95                                                          |             |
| h,k,lmax       | 17,17,28                                                         | 17,17,28    |
| Nref           | 16061                                                            | 16039       |
| Tmin,Tmax      | 0.004,0.091                                                      | 0.004,0.091 |
| Tmin'          | 0.001                                                            |             |

Correction method= # Reported T Limits: Tmin=0.004 Tmax=0.091  
 AbsCorr = MULTI-SCAN

Data completeness= 0.999 Theta(max)= 25.500



R(reflections)= 0.0463( 12441)      wR2(reflections)= 0.1226( 16039)

S = 1.070      Npar= 856

---

The following ALERTS were generated. Each ALERT has the format

**test-name\_ALERT\_alert-type\_alert-level.**

Click on the hyperlinks for more details of the test.

---

[IMAGE] **Alert level C**

|                   |            |           |     |                             |       |     |       |
|-------------------|------------|-----------|-----|-----------------------------|-------|-----|-------|
| PLAT220_ALERT_2_C | NonSolvent | Resd 1    | O   | Ueq(max)/Ueq(min)           | Range | 3.3 | Ratio |
| PLAT242_ALERT_2_C | Low        | 'MainMol' | Ueq | as Compared to Neighbors of |       | Tm1 | Check |

---

[IMAGE] **Alert level G**

FORMU01\_ALERT\_2\_G There is a discrepancy between the atom counts in the  
    \_chemical\_formula\_sum and the formula from the \_atom\_site\* data.  
    Atom count from \_chemical\_formula\_sum: C30 H195 N15 O156 Te2 Tm2 W34  
    Atom count from the \_atom\_site data: C16 N8 O128 Te2 Tm2 W34  
CELLZ01\_ALERT\_1\_G Difference between formula and atom\_site contents detected.  
CELLZ01\_ALERT\_1\_G ALERT: Large difference may be due to a  
    symmetry error - see SYMMG tests  
    From the CIF: \_cell\_formula\_units\_Z      1  
    From the CIF: \_chemical\_formula\_sum C30 H195 N15 O156 Te2 Tm2 W34  
TEST: Compare cell contents of formula and atom\_site data

| atom | Z*formula | cif sites | diff   |
|------|-----------|-----------|--------|
| C    | 30.00     | 16.00     | 14.00  |
| H    | 195.00    | 0.00      | 195.00 |
| N    | 15.00     | 8.00      | 7.00   |
| O    | 156.00    | 128.00    | 28.00  |
| Te   | 2.00      | 2.00      | 0.00   |
| Tm   | 2.00      | 2.00      | 0.00   |
| W    | 34.00     | 34.00     | 0.00   |

|                   |                                                  |                                        |       |              |
|-------------------|--------------------------------------------------|----------------------------------------|-------|--------------|
| PLAT003_ALERT_2_G | Number of Uiso or Uij                            | Restrained non-H Atoms ...             | 11    | Report       |
| PLAT012_ALERT_1_G | N.O.K.                                           | _shelx_res_checksum Found in CIF ..... |       | Please Check |
| PLAT040_ALERT_1_G | No H-atoms in this Carbon                        | Containing Compound ..                 |       | Please Check |
| PLAT041_ALERT_1_G | Calc. and Reported SumFormula                    | Strings Differ                         |       | Please Check |
| PLAT066_ALERT_1_G | Predicted and Reported Tmin&Tmax                 | Range Identical                        |       | ? Check      |
| PLAT154_ALERT_1_G | The s.u.'s on the Cell Angles are Equal ..(Note) |                                        | 0.003 | Degree       |
| PLAT186_ALERT_4_G | The CIF-Embedded .res File Contains              | ISOR Records                           | 5     | Report       |
| PLAT606_ALERT_4_G | Solvent Accessible VOID(S) in Structure .....    |                                        | !     | Info         |
| PLAT794_ALERT_5_G | Tentative Bond Valency for W1                    | (VI)                                   | 5.90  | Info         |
| PLAT794_ALERT_5_G | Tentative Bond Valency for W2                    | (VI)                                   | 5.89  | Info         |
| PLAT794_ALERT_5_G | Tentative Bond Valency for W3                    | (VI)                                   | 5.91  | Info         |
| PLAT794_ALERT_5_G | Tentative Bond Valency for W4                    | (VI)                                   | 5.81  | Info         |
| PLAT794_ALERT_5_G | Tentative Bond Valency for W5                    | (VI)                                   | 5.91  | Info         |
| PLAT794_ALERT_5_G | Tentative Bond Valency for W6                    | (VI)                                   | 6.01  | Info         |
| PLAT794_ALERT_5_G | Tentative Bond Valency for W7                    | (VI)                                   | 5.76  | Info         |
| PLAT794_ALERT_5_G | Tentative Bond Valency for W8                    | (VI)                                   | 5.80  | Info         |
| PLAT794_ALERT_5_G | Tentative Bond Valency for W9                    | (VI)                                   | 5.95  | Info         |
| PLAT794_ALERT_5_G | Tentative Bond Valency for W10                   | (VI)                                   | 5.99  | Info         |
| PLAT794_ALERT_5_G | Tentative Bond Valency for W11                   | (VI)                                   | 5.96  | Info         |
| PLAT794_ALERT_5_G | Tentative Bond Valency for W12                   | (VI)                                   | 5.89  | Info         |
| PLAT794_ALERT_5_G | Tentative Bond Valency for W13                   | (VI)                                   | 5.81  | Info         |
| PLAT794_ALERT_5_G | Tentative Bond Valency for W14                   | (VI)                                   | 5.98  | Info         |
| PLAT794_ALERT_5_G | Tentative Bond Valency for W15                   | (VI)                                   | 5.73  | Info         |
| PLAT794_ALERT_5_G | Tentative Bond Valency for W16                   | (VI)                                   | 5.84  | Info         |
| PLAT794_ALERT_5_G | Tentative Bond Valency for W17                   | (VI)                                   | 5.82  | Info         |
| PLAT794_ALERT_5_G | Tentative Bond Valency for Tm1                   | (III)                                  | 3.07  | Info         |

|                   |                                              |            |   |      |      |
|-------------------|----------------------------------------------|------------|---|------|------|
| PLAT794_ALERT_5_G | Tentative Bond Valency for Te1               | (VI)       | . | 5.07 | Info |
| PLAT860_ALERT_3_G | Number of Least-Squares Restraints           | .....      |   | 60   | Note |
| PLAT868_ALERT_4_G | ALERTS Due to the Use of _smtbx_masks        | Suppressed |   | !    | Info |
| PLAT933_ALERT_2_G | Number of OMIT Records in Embedded .res File | ...        |   | 12   | Note |
| PLAT941_ALERT_3_G | Average HKL Measurement Multiplicity         | .....      |   | 2.4  | Low  |

---

0 **ALERT level A** = Most likely a serious problem - resolve or explain  
0 **ALERT level B** = A potentially serious problem, consider carefully  
2 **ALERT level C** = Check. Ensure it is not caused by an omission or oversight  
34 **ALERT level G** = General information/check it is not something unexpected

7 ALERT type 1 CIF construction/syntax error, inconsistent or missing data  
5 ALERT type 2 Indicator that the structure model may be wrong or deficient  
2 ALERT type 3 Indicator that the structure quality may be low  
3 ALERT type 4 Improvement, methodology, query or suggestion  
19 ALERT type 5 Informative message, check

---

## Datablock: compound\_dimer\_Yb

---

Bond precision: N- C = 0.0283 A Wavelength=0.71073

Cell: a=14.0328(3) b=14.4419(3) c=23.4762(4)  
alpha=106.219(1) beta=94.579(1) gamma=110.586(2)  
Temperature: 296 K

|                | Calculated                                                       | Reported    |
|----------------|------------------------------------------------------------------|-------------|
| Volume         | 4191.91(16)                                                      | 4191.90(15) |
| Space group    | P -1                                                             | P -1        |
| Hall group     | -P 1                                                             | -P 1        |
| Moiety formula | 0128 Te2 W34 Yb2, 4(C1.50 N), 4(C2 N), 4.4(O) [+ solvent]        | ?           |
| Sum formula    | C14 N8 O132.40 Te2 W34 Yb2 C30 H195 N15 O156 Te2 W34 [+ solvent] | Yb2         |
| Mr             | 9250.46                                                          | 10114.70    |
| Dx,g cm-3      | 3.664                                                            | 4.006       |
| Z              | 1                                                                | 1           |
| Mu (mm-1)      | 24.751                                                           | 24.751      |
| F000           | 3959.2                                                           | 3959.0      |
| F000'          | 3936.04                                                          |             |
| h,k,lmax       | 20,21,34                                                         | 20,20,34    |
| Nref           | 27980                                                            | 24399       |
| Tmin,Tmax      | 0.004,0.084                                                      | 0.004,0.084 |
| Tmin'          | 0.000                                                            |             |

Correction method= # Reported T Limits: Tmin=0.004 Tmax=0.084  
AbsCorr = MULTI-SCAN

Data completeness= 0.872

Theta(max)= 31.525

R(reflections)= 0.0533( 18492)

wR2(reflections)= 0.1400( 24399)

S = 1.072

Npar= 883

---

The following ALERTS were generated. Each ALERT has the format

**test-name\_ALERT\_alert-type\_alert-level.**

Click on the hyperlinks for more details of the test.

---

[IMAGE] **Alert level B**

PLAT306\_ALERT\_2\_B Isolated Oxygen Atom (H-atoms Missing ?) ..... 065 Check

---

[IMAGE] **Alert level C**

PLAT220\_ALERT\_2\_C NonSolvent Resd 1 O Ueq(max)/Ueq(min) Range 3.7 Ratio

PLAT244\_ALERT\_4\_C Low 'Solvent' Ueq as Compared to Neighbors of N2 Check

---

[IMAGE] **Alert level G**

FORMU01\_ALERT\_2\_G There is a discrepancy between the atom counts in the  
\_chemical\_formula\_sum and the formula from the \_atom\_site\* data.

Atom count from \_chemical\_formula\_sum: C30 H195 N15 O156 Te2 W34 Yb2

Atom count from the \_atom\_site data: C14 N8 O132.4 Te2 W34 Yb2

CELLZ01\_ALERT\_1\_G Difference between formula and atom\_site contents detected.

CELLZ01\_ALERT\_1\_G ALERT: Large difference may be due to a

symmetry error - see SYMMG tests

From the CIF: \_cell\_formula\_units\_Z 1

From the CIF: \_chemical\_formula\_sum C30 H195 N15 O156 Te2 W34 Yb2

TEST: Compare cell contents of formula and atom\_site data

| atom | Z*formula | cif sites | diff   |
|------|-----------|-----------|--------|
| C    | 30.00     | 14.00     | 16.00  |
| H    | 195.00    | 0.00      | 195.00 |
| N    | 15.00     | 8.00      | 7.00   |
| O    | 156.00    | 132.40    | 23.60  |
| Te   | 2.00      | 2.00      | 0.00   |
| W    | 34.00     | 34.00     | 0.00   |
| Yb   | 2.00      | 2.00      | 0.00   |

PLAT003\_ALERT\_2\_G Number of Uiso or Uij Restrained non-H Atoms ... 20 Report

PLAT012\_ALERT\_1\_G N.O.K. \_shelx\_res\_checksum Found in CIF ..... Please Check

PLAT040\_ALERT\_1\_G No H-atoms in this Carbon Containing Compound .. Please Check

PLAT041\_ALERT\_1\_G Calc. and Reported SumFormula Strings Differ Please Check

PLAT066\_ALERT\_1\_G Predicted and Reported Tmin&Tmax Range Identical ? Check

PLAT068\_ALERT\_1\_G Reported F000 Differs from Calcd (or Missing)... Please Check

PLAT083\_ALERT\_2\_G SHELXL Second Parameter in WGHT Unusually Large 84.85 Why ?

PLAT186\_ALERT\_4\_G The CIF-Embedded .res File Contains ISOR Records 11 Report

PLAT300\_ALERT\_4\_G Atom Site Occupancy of C2 Constrained at 0.5 Check

PLAT300\_ALERT\_4\_G Atom Site Occupancy of C7 Constrained at 0.5 Check

PLAT300\_ALERT\_4\_G Atom Site Occupancy of O66 Constrained at 0.7 Check

PLAT300\_ALERT\_4\_G Atom Site Occupancy of O67 Constrained at 0.5 Check

PLAT302\_ALERT\_4\_G Anion/Solvent/Minor-Residue Disorder (Resd 2 ) 20% Note

PLAT302\_ALERT\_4\_G Anion/Solvent/Minor-Residue Disorder (Resd 5 ) 20% Note

PLAT302\_ALERT\_4\_G Anion/Solvent/Minor-Residue Disorder (Resd 7 ) 100% Note

PLAT302\_ALERT\_4\_G Anion/Solvent/Minor-Residue Disorder (Resd 8 ) 100% Note

PLAT304\_ALERT\_4\_G Non-Integer Number of Atoms in ..... (Resd 2 ) 2.50 Check

PLAT304\_ALERT\_4\_G Non-Integer Number of Atoms in ..... (Resd 5 ) 2.50 Check

PLAT304\_ALERT\_4\_G Non-Integer Number of Atoms in ..... (Resd 7 ) 0.70 Check

|                   |                                                  |           |      |       |
|-------------------|--------------------------------------------------|-----------|------|-------|
| PLAT304_ALERT_4_G | Non-Integer Number of Atoms in .....             | (Resd 8 ) | 0.50 | Check |
| PLAT311_ALERT_2_G | Isolated Disordered Oxygen Atom (No H's ?) ..... |           | 066  | Check |
| PLAT311_ALERT_2_G | Isolated Disordered Oxygen Atom (No H's ?) ..... |           | 067  | Check |
| PLAT606_ALERT_4_G | Solvent Accessible VOID(S) in Structure .....    |           | !    | Info  |
| PLAT720_ALERT_4_G | Number of Unusual/Non-Standard Labels .....      |           | 1    | Note  |
| PLAT790_ALERT_4_G | Centre of Gravity not Within Unit Cell: Resd. #  |           | 2    | Note  |
|                   | C1.50 N                                          |           |      |       |
| PLAT790_ALERT_4_G | Centre of Gravity not Within Unit Cell: Resd. #  |           | 4    | Note  |
|                   | C2 N                                             |           |      |       |
| PLAT790_ALERT_4_G | Centre of Gravity not Within Unit Cell: Resd. #  |           | 7    | Note  |
|                   | O                                                |           |      |       |
| PLAT794_ALERT_5_G | Tentative Bond Valency for W1                    | (VI) .    | 6.19 | Info  |
| PLAT794_ALERT_5_G | Tentative Bond Valency for W2                    | (VI) .    | 6.11 | Info  |
| PLAT794_ALERT_5_G | Tentative Bond Valency for W3                    | (VI) .    | 6.02 | Info  |
| PLAT794_ALERT_5_G | Tentative Bond Valency for W4                    | (VI) .    | 6.12 | Info  |
| PLAT794_ALERT_5_G | Tentative Bond Valency for W5                    | (VI) .    | 6.15 | Info  |
| PLAT794_ALERT_5_G | Tentative Bond Valency for W6                    | (VI) .    | 6.27 | Info  |
| PLAT794_ALERT_5_G | Tentative Bond Valency for W7                    | (VI) .    | 6.18 | Info  |
| PLAT794_ALERT_5_G | Tentative Bond Valency for W8                    | (VI) .    | 6.09 | Info  |
| PLAT794_ALERT_5_G | Tentative Bond Valency for W9                    | (VI) .    | 6.20 | Info  |
| PLAT794_ALERT_5_G | Tentative Bond Valency for W10                   | (VI) .    | 6.22 | Info  |
| PLAT794_ALERT_5_G | Tentative Bond Valency for W11                   | (VI) .    | 6.01 | Info  |
| PLAT794_ALERT_5_G | Tentative Bond Valency for W12                   | (VI) .    | 6.22 | Info  |
| PLAT794_ALERT_5_G | Tentative Bond Valency for W13                   | (VI) .    | 6.30 | Info  |
| PLAT794_ALERT_5_G | Tentative Bond Valency for W14                   | (VI) .    | 6.15 | Info  |
| PLAT794_ALERT_5_G | Tentative Bond Valency for W15                   | (VI) .    | 6.05 | Info  |
| PLAT794_ALERT_5_G | Tentative Bond Valency for W16                   | (VI) .    | 6.07 | Info  |
| PLAT794_ALERT_5_G | Tentative Bond Valency for W17                   | (VI) .    | 5.96 | Info  |
| PLAT794_ALERT_5_G | Tentative Bond Valency for Yb1                   | (III) .   | 3.09 | Info  |
| PLAT794_ALERT_5_G | Tentative Bond Valency for Te1                   | (VI) .    | 5.41 | Info  |
| PLAT860_ALERT_3_G | Number of Least-Squares Restraints .....         |           | 120  | Note  |
| PLAT868_ALERT_4_G | ALERTS Due to the Use of _smtbx_masks Suppressed |           | !    | Info  |
| PLAT933_ALERT_2_G | Number of OMIT Records in Embedded .res File ... |           | 1    | Note  |
| PLAT941_ALERT_3_G | Average HKL Measurement Multiplicity .....       |           | 2.1  | Low   |

---

0 **ALERT level A** = Most likely a serious problem - resolve or explain  
 1 **ALERT level B** = A potentially serious problem, consider carefully  
 2 **ALERT level C** = Check. Ensure it is not caused by an omission or oversight  
 53 **ALERT level G** = General information/check it is not something unexpected

7 ALERT type 1 CIF construction/syntax error, inconsistent or missing data  
 8 ALERT type 2 Indicator that the structure model may be wrong or deficient  
 2 ALERT type 3 Indicator that the structure quality may be low  
 20 ALERT type 4 Improvement, methodology, query or suggestion  
 19 ALERT type 5 Informative message, check

---

## Datablock: compound\_dimer\_Lu

---

Bond precision: N- C = 0.0205 A

Wavelength=0.71073

Cell: a=14.0315(3) b=14.4627(3) c=23.4500(4)  
 alpha=106.240(2) beta=94.616(2) gamma=110.580(2)  
 Temperature: 296 K

|                | Calculated                                                       | Reported    |
|----------------|------------------------------------------------------------------|-------------|
| Volume         | 4191.86(17)                                                      | 4191.86(16) |
| Space group    | P -1                                                             | P -1        |
| Hall group     | -P 1                                                             | -P 1        |
| Moiety formula | Lu2 O128 Te2 W34, 8(C2 N), ?<br>5(O) [+ solvent]                 |             |
| Sum formula    | C16 Lu2 N8 O133 Te2 W34 [+ C30 H199 Lu2 N15 O158 Te2<br>solvent] | W34         |
| Mr             | 9287.94                                                          | 10154.60    |
| Dx,g cm-3      | 3.679                                                            | 4.022       |
| Z              | 1                                                                | 1           |
| Mu (mm-1)      | 24.814                                                           | 24.814      |
| F000           | 3978.0                                                           | 3978.0      |
| F000'          | 3954.67                                                          |             |
| h,k,lmax       | 20,21,34                                                         | 20,20,34    |
| Nref           | 27973                                                            | 24701       |
| Tmin,Tmax      | 0.004,0.084                                                      | 0.004,0.084 |
| Tmin'          | 0.000                                                            |             |

Correction method= # Reported T Limits: Tmin=0.004 Tmax=0.084  
AbsCorr = MULTI-SCAN

Data completeness= 0.883                      Theta(max)= 31.523

R(reflections)= 0.0440( 18390)              wR2(reflections)= 0.1013( 24701)

S = 1.026                                      Npar= 883

The following ALERTS were generated. Each ALERT has the format

**test-name\_ALERT\_alert-type\_alert-level.**

Click on the hyperlinks for more details of the test.

[IMAGE] **Alert level B**

|                                                                  |           |
|------------------------------------------------------------------|-----------|
| PLAT306_ALERT_2_B Isolated Oxygen Atom (H-atoms Missing ?) ..... | 065 Check |
| PLAT306_ALERT_2_B Isolated Oxygen Atom (H-atoms Missing ?) ..... | 066 Check |

[IMAGE] **Alert level C**

|                            |                                           |            |
|----------------------------|-------------------------------------------|------------|
| PLAT213_ALERT_2_C Atom O33 | has ADP max/min Ratio .....               | 3.3 oblate |
| PLAT244_ALERT_4_C Low      | 'Solvent' Ueq as Compared to Neighbors of | N2 Check   |
| PLAT244_ALERT_4_C Low      | 'Solvent' Ueq as Compared to Neighbors of | N4 Check   |

[IMAGE] **Alert level G**

FORMU01\_ALERT\_2\_G There is a discrepancy between the atom counts in the  
                   \_chemical\_formula\_sum and the formula from the \_atom\_site\* data.  
                   Atom count from \_chemical\_formula\_sum: C30 H199 Lu2 N15 O158 Te2 W34  
                   Atom count from the \_atom\_site data: C16 Lu2 N8 O133 Te2 W34  
 CELLZ01\_ALERT\_1\_G Difference between formula and atom\_site contents detected.  
 CELLZ01\_ALERT\_1\_G ALERT: Large difference may be due to a  
                   symmetry error - see SYMMG tests  
                   From the CIF: \_cell\_formula\_units\_Z      1

From the CIF: \_chemical\_formula\_sum C30 H199 Lu2 N15 O158 Te2 W34  
 TEST: Compare cell contents of formula and atom\_site data

| atom | Z*formula | cif sites | diff   |
|------|-----------|-----------|--------|
| C    | 30.00     | 16.00     | 14.00  |
| H    | 199.00    | 0.00      | 199.00 |
| Lu   | 2.00      | 2.00      | 0.00   |
| N    | 15.00     | 8.00      | 7.00   |
| O    | 158.00    | 133.00    | 25.00  |
| Te   | 2.00      | 2.00      | 0.00   |
| W    | 34.00     | 34.00     | 0.00   |

|                   |                                                  |       |              |
|-------------------|--------------------------------------------------|-------|--------------|
| PLAT003_ALERT_2_G | Number of Uiso or Uij Restrained non-H Atoms ... | 6     | Report       |
| PLAT012_ALERT_1_G | N.O.K. _shelx_res_checksum Found in CIF .....    |       | Please Check |
| PLAT040_ALERT_1_G | No H-atoms in this Carbon Containing Compound .. |       | Please Check |
| PLAT041_ALERT_1_G | Calc. and Reported SumFormula Strings Differ     |       | Please Check |
| PLAT066_ALERT_1_G | Predicted and Reported Tmin&Tmax Range Identical | ?     | Check        |
| PLAT154_ALERT_1_G | The s.u.'s on the Cell Angles are Equal ..(Note) | 0.002 | Degree       |
| PLAT180_ALERT_4_G | Check Cell Rounding: # of Values Ending with 0 = | 3     | Note         |
| PLAT186_ALERT_4_G | The CIF-Embedded .res File Contains ISOR Records | 6     | Report       |
| PLAT300_ALERT_4_G | Atom Site Occupancy of O67 Constrained at        | 0.5   | Check        |
| PLAT302_ALERT_4_G | Anion/Solvent/Minor-Residue Disorder (Resd 8 )   | 100%  | Note         |
| PLAT304_ALERT_4_G | Non-Integer Number of Atoms in ..... (Resd 8 )   | 0.50  | Check        |
| PLAT311_ALERT_2_G | Isolated Disordered Oxygen Atom (No H's ?) ..... | 067   | Check        |
| PLAT606_ALERT_4_G | Solvent Accessible VOID(S) in Structure .....    | !     | Info         |
| PLAT794_ALERT_5_G | Tentative Bond Valency for W1 (VI) .             | 6.08  | Info         |
| PLAT794_ALERT_5_G | Tentative Bond Valency for W2 (VI) .             | 5.97  | Info         |
| PLAT794_ALERT_5_G | Tentative Bond Valency for W3 (VI) .             | 6.08  | Info         |
| PLAT794_ALERT_5_G | Tentative Bond Valency for W4 (VI) .             | 6.20  | Info         |
| PLAT794_ALERT_5_G | Tentative Bond Valency for W5 (VI) .             | 6.14  | Info         |
| PLAT794_ALERT_5_G | Tentative Bond Valency for W6 (VI) .             | 6.06  | Info         |
| PLAT794_ALERT_5_G | Tentative Bond Valency for W7 (VI) .             | 6.16  | Info         |
| PLAT794_ALERT_5_G | Tentative Bond Valency for W8 (VI) .             | 6.09  | Info         |
| PLAT794_ALERT_5_G | Tentative Bond Valency for W9 (VI) .             | 6.27  | Info         |
| PLAT794_ALERT_5_G | Tentative Bond Valency for W10 (VI) .            | 6.16  | Info         |
| PLAT794_ALERT_5_G | Tentative Bond Valency for W11 (VI) .            | 6.23  | Info         |
| PLAT794_ALERT_5_G | Tentative Bond Valency for W12 (VI) .            | 6.14  | Info         |
| PLAT794_ALERT_5_G | Tentative Bond Valency for W13 (VI) .            | 6.18  | Info         |
| PLAT794_ALERT_5_G | Tentative Bond Valency for W14 (VI) .            | 6.14  | Info         |
| PLAT794_ALERT_5_G | Tentative Bond Valency for W15 (VI) .            | 6.10  | Info         |
| PLAT794_ALERT_5_G | Tentative Bond Valency for W16 (VI) .            | 6.19  | Info         |
| PLAT794_ALERT_5_G | Tentative Bond Valency for W17 (VI) .            | 6.09  | Info         |
| PLAT794_ALERT_5_G | Tentative Bond Valency for Lu1 (III) .           | 3.20  | Info         |
| PLAT794_ALERT_5_G | Tentative Bond Valency for Te1 (VI) .            | 5.48  | Info         |
| PLAT860_ALERT_3_G | Number of Least-Squares Restraints .....         | 36    | Note         |
| PLAT868_ALERT_4_G | ALERTS Due to the Use of _smtbx_masks Suppressed | !     | Info         |
| PLAT933_ALERT_2_G | Number of OMIT Records in Embedded .res File ... | 12    | Note         |
| PLAT941_ALERT_3_G | Average HKL Measurement Multiplicity .....       | 2.2   | Low          |

---

0 **ALERT level A** = Most likely a serious problem - resolve or explain  
 2 **ALERT level B** = A potentially serious problem, consider carefully  
 3 **ALERT level C** = Check. Ensure it is not caused by an omission or oversight  
 39 **ALERT level G** = General information/check it is not something unexpected

7 **ALERT type 1** CIF construction/syntax error, inconsistent or missing data  
 7 **ALERT type 2** Indicator that the structure model may be wrong or deficient  
 2 **ALERT type 3** Indicator that the structure quality may be low  
 9 **ALERT type 4** Improvement, methodology, query or suggestion  
 19 **ALERT type 5** Informative message, check

---

It is advisable to attempt to resolve as many as possible of the alerts in all categories. Often the minor alerts point to easily fixed oversights, errors and omissions in your CIF or refinement strategy, so attention to these fine details can be worthwhile. In order to resolve some of the more serious problems it may be necessary to carry out additional measurements or structure refinements. However, the purpose of your study may justify the reported deviations and the more serious of these should normally be commented upon in the discussion or experimental section of a paper or in the "special\_details" fields of the CIF. checkCIF was carefully designed to identify outliers and unusual parameters, but every test has its limitations and alerts that are not important in a particular case may appear. Conversely, the absence of alerts does not guarantee there are no aspects of the results needing attention. It is up to the individual to critically assess their own results and, if necessary, seek expert advice.

### **Publication of your CIF in IUCr journals**

A basic structural check has been run on your CIF. These basic checks will be run on all CIFs submitted for publication in IUCr journals (*Acta Crystallographica*, *Journal of Applied Crystallography*, *Journal of Synchrotron Radiation*); however, if you intend to submit to *Acta Crystallographica Section C* or *E* or *IUCrData*, you should make sure that full publication checks are run on the final version of your CIF prior to submission.

### **Publication of your CIF in other journals**

Please refer to the *Notes for Authors* of the relevant journal for any special instructions relating to CIF submission.

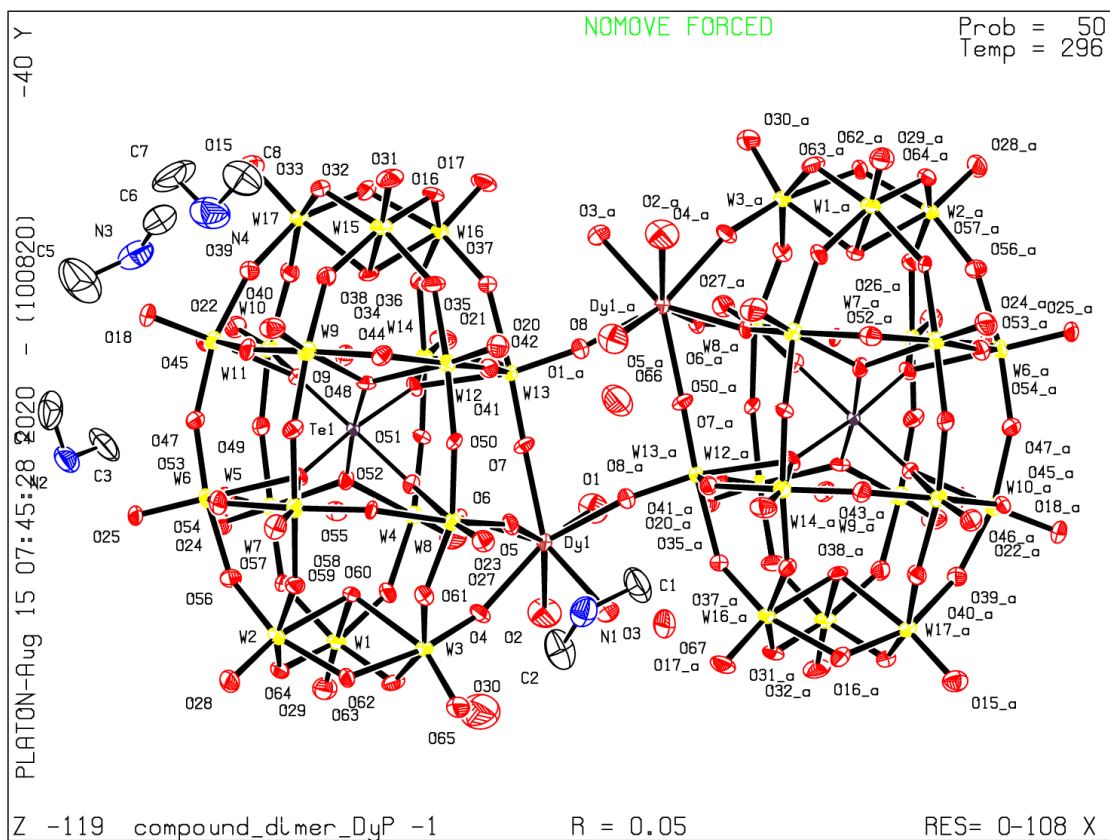



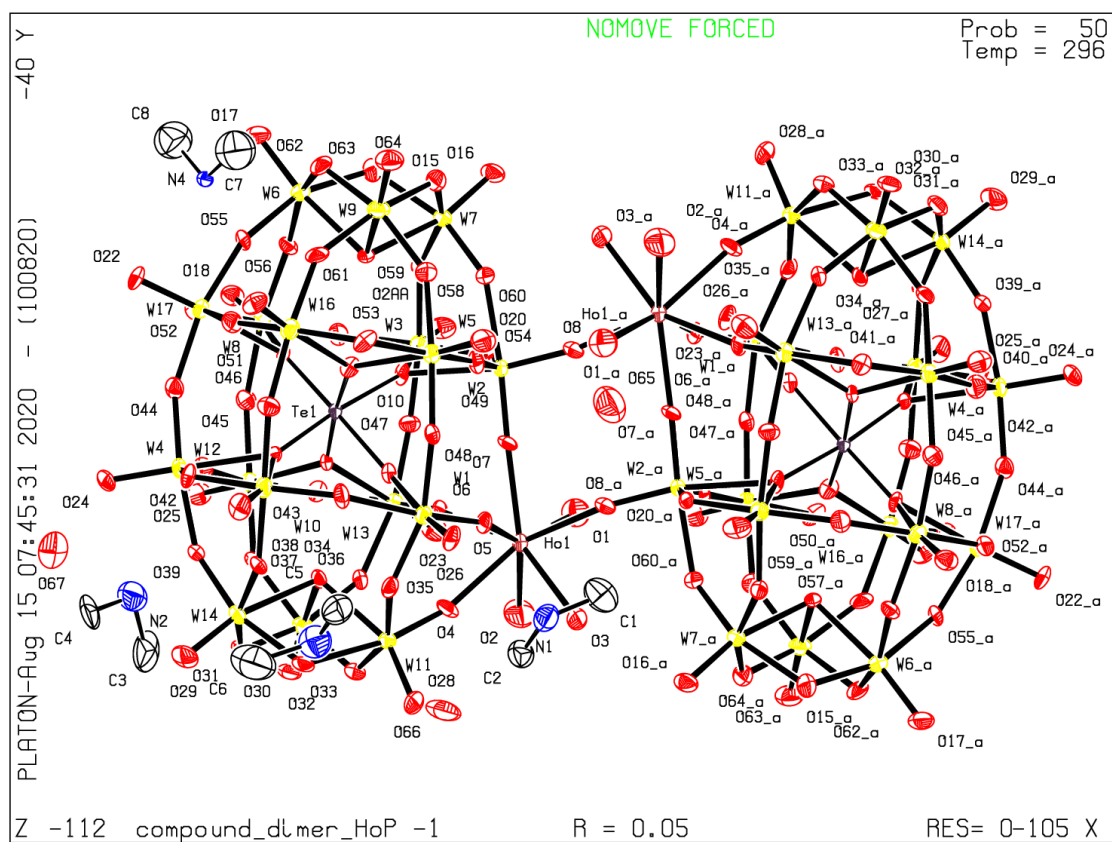

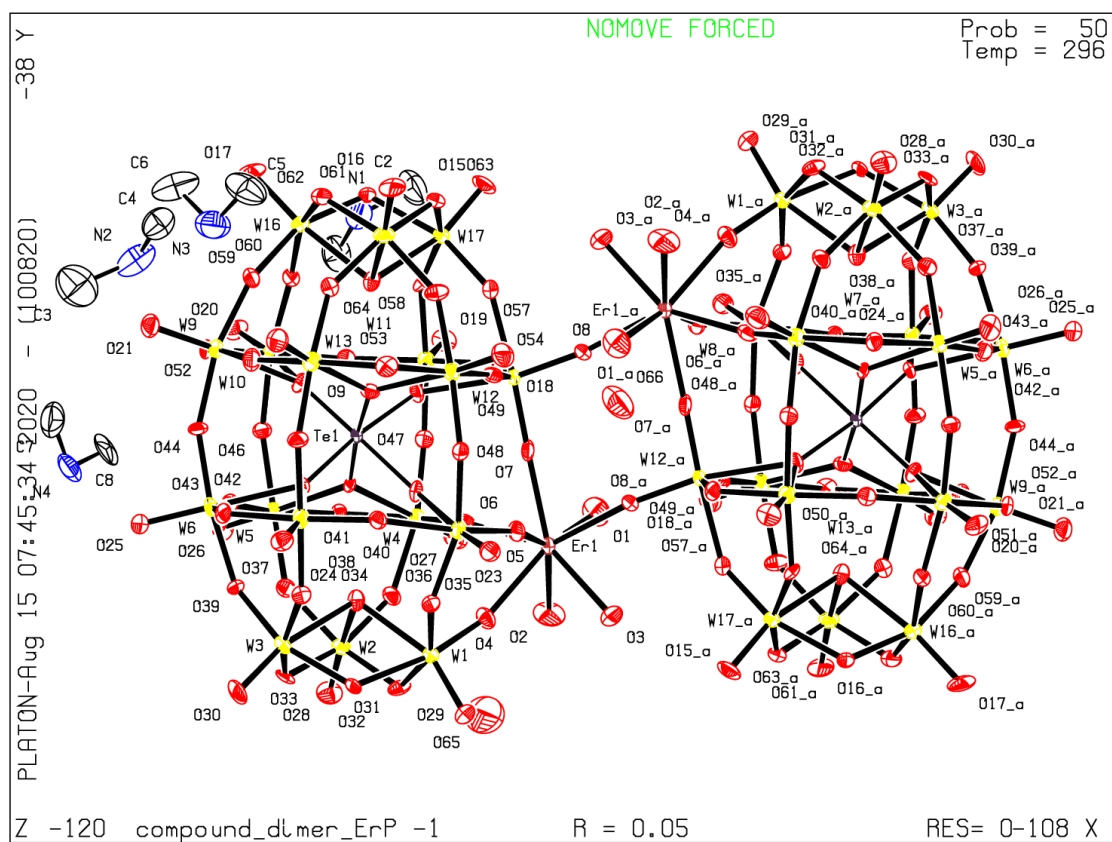

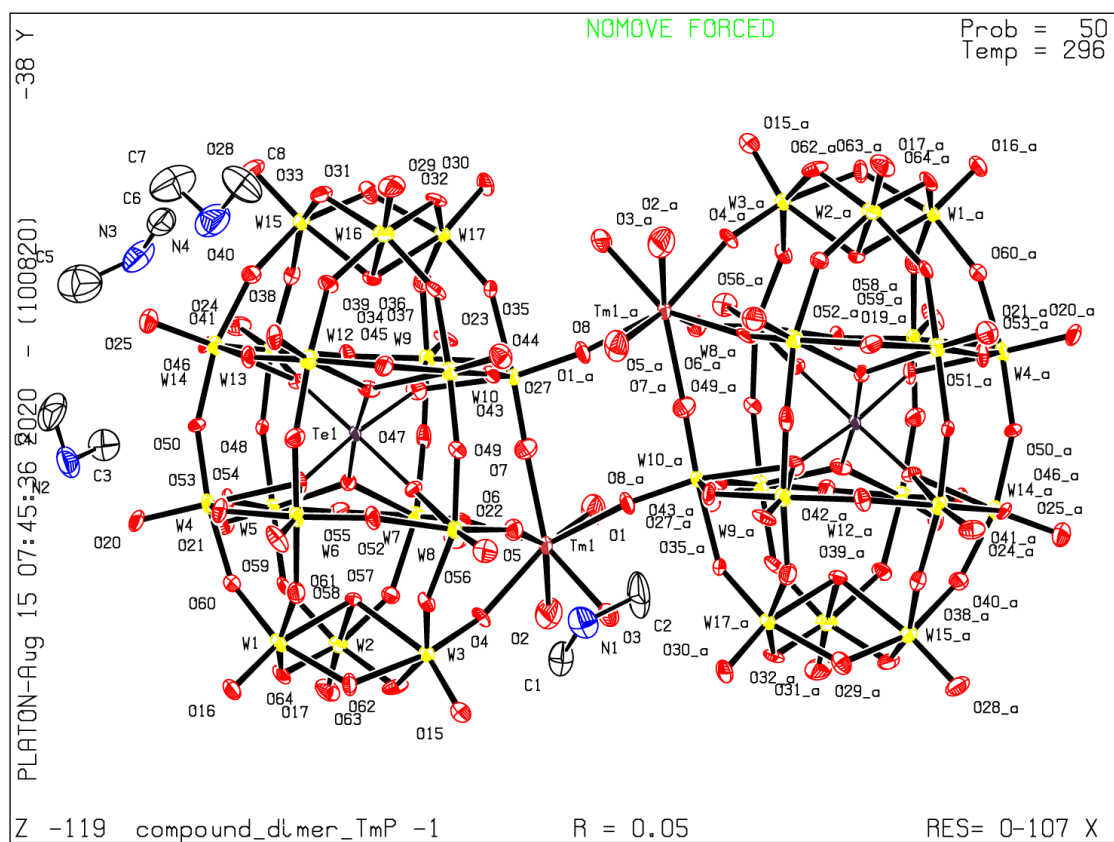

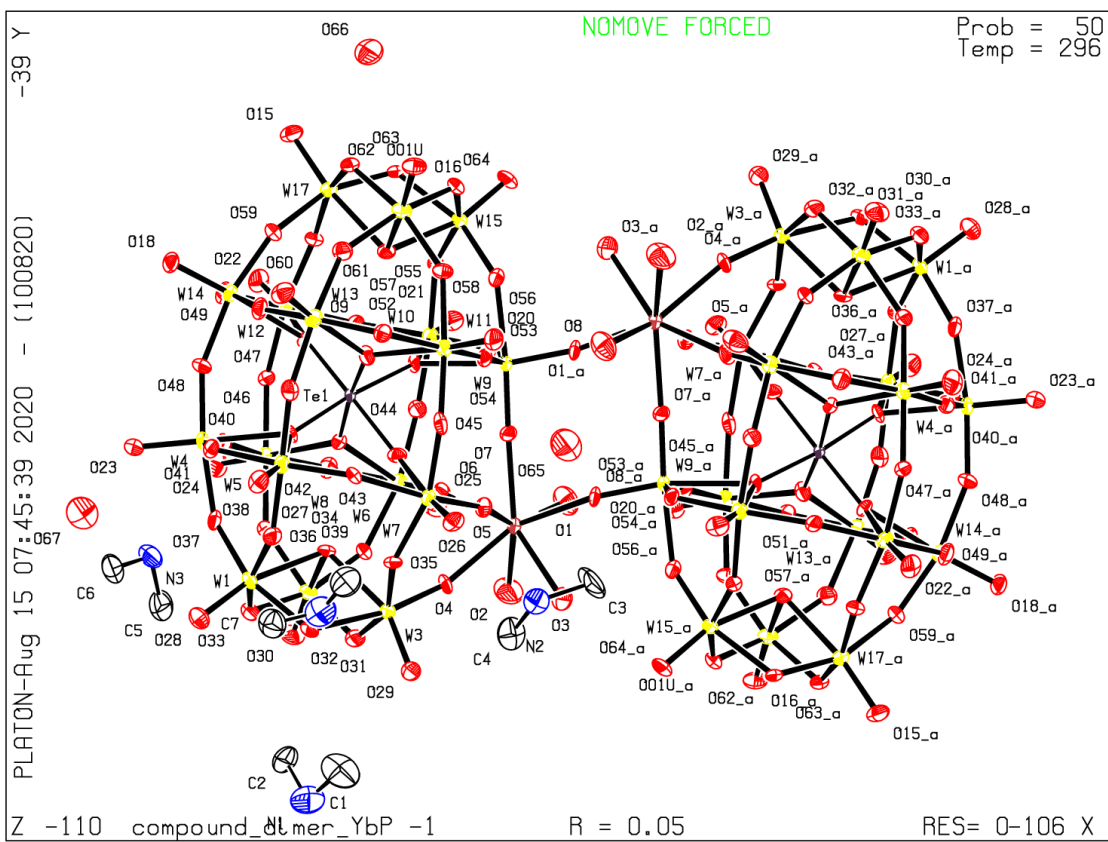

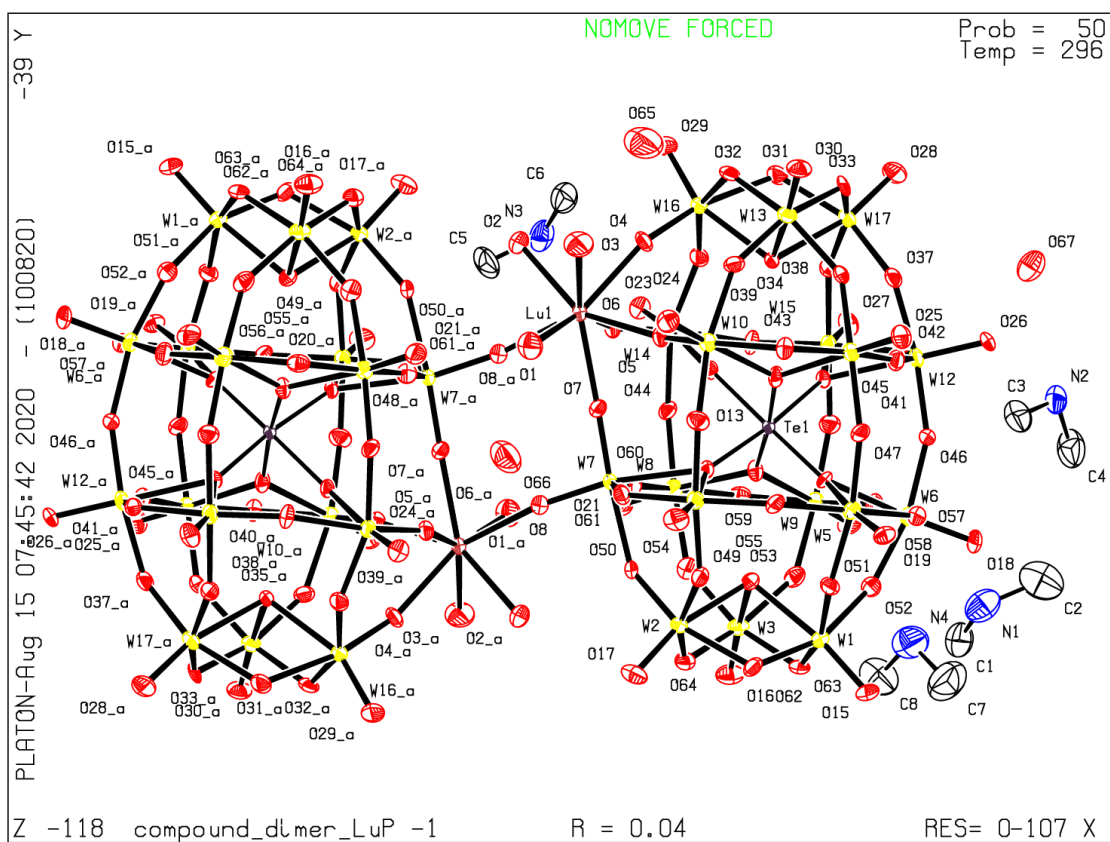

Supplement: Supplementary file [file 25559132]
